# Supplementary material for: Characterizing the Role of AosfgA and AofluG in Mycelial and Conidial Development in Arthrobotrys oligospora and Their Role in Secondary Metabolism
Source: MDPI journal article supplement (doi:10.3390/microorganisms12030615), 2024-03-19
Supplement: s1 [file s1]

## Supporting Information

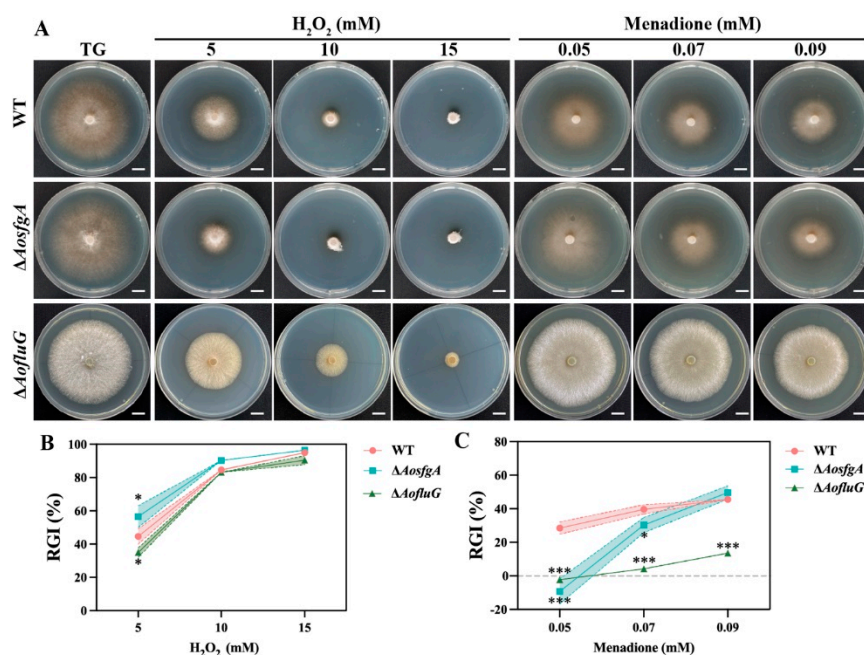

**Figure S1.** Comparison of stress response to oxidative reagents between WT,  $\Delta AosfgA$  and  $\Delta AofluG$  mutant strains. **(A)** Colony morphology on the medium supplemented with different oxidants. Bar = 1 cm. **(B, C)** Comparison of RGI values under  $H_2O_2$  (B) and menadione (C). Asterisks indicate that the mutant strain significantly differs from the WT strain (Tukey's HSD,  $*p < 0.05$ ,  $***p < 0.001$ ).

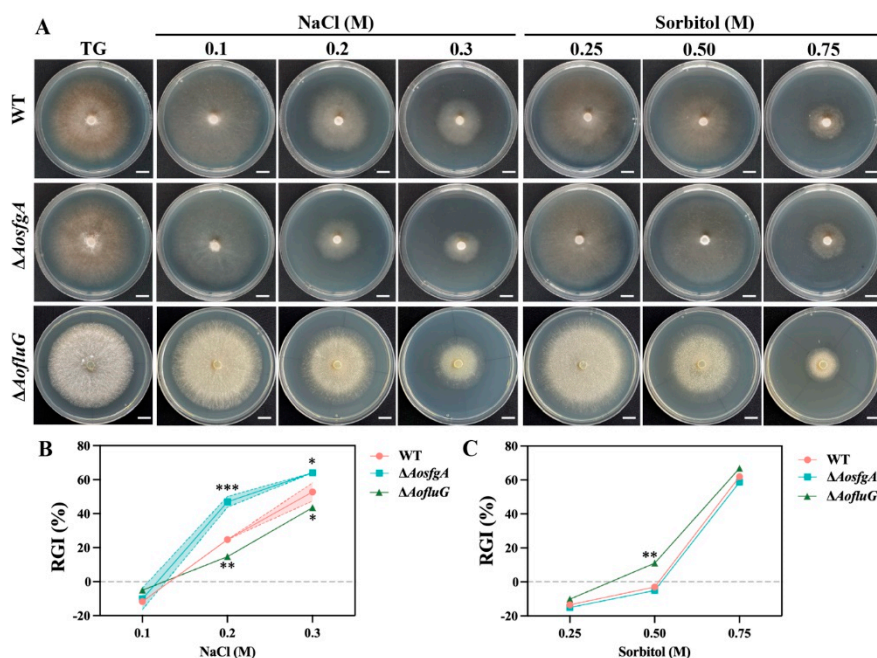

**Figure S2.** Comparison of stress response to osmotic reagents between WT,  $\Delta AosfgA$  and  $\Delta AofluG$  mutant strains. **(A)** Colony morphology on medium supplemented with different high osmotic chemical reagents. Bar = 1 cm. **(B, C)** Comparison of RGI values under NaCl (B) and sorbitol (C). Asterisks indicate that the mutant strain significantly differs from the WT strain (Tukey's HSD,  $*p < 0.05$ ,  $**p < 0.01$ ,  $***p < 0.001$ ).

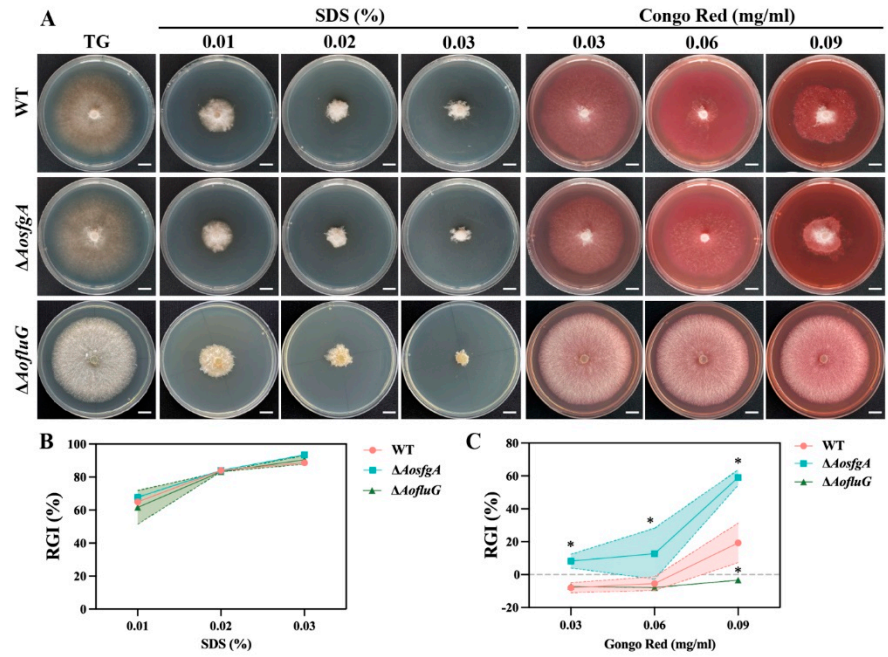

**Figure S3.** Comparison of stress response to cell wall synthesis-disturbing reagents between WT,  $\Delta AofgA$  and  $\Delta AofluG$  mutant strains. **(A)** Colony morphology on medium supplemented with different cell wall synthesis-disturbing reagents. Bar = 1 cm. **(B, C)** Comparison of RGI values under SDS (B) and congo red (C). Asterisks indicate that the mutant strain significantly differs from the WT strain (Tukey's HSD,  $*p < 0.05$ ).

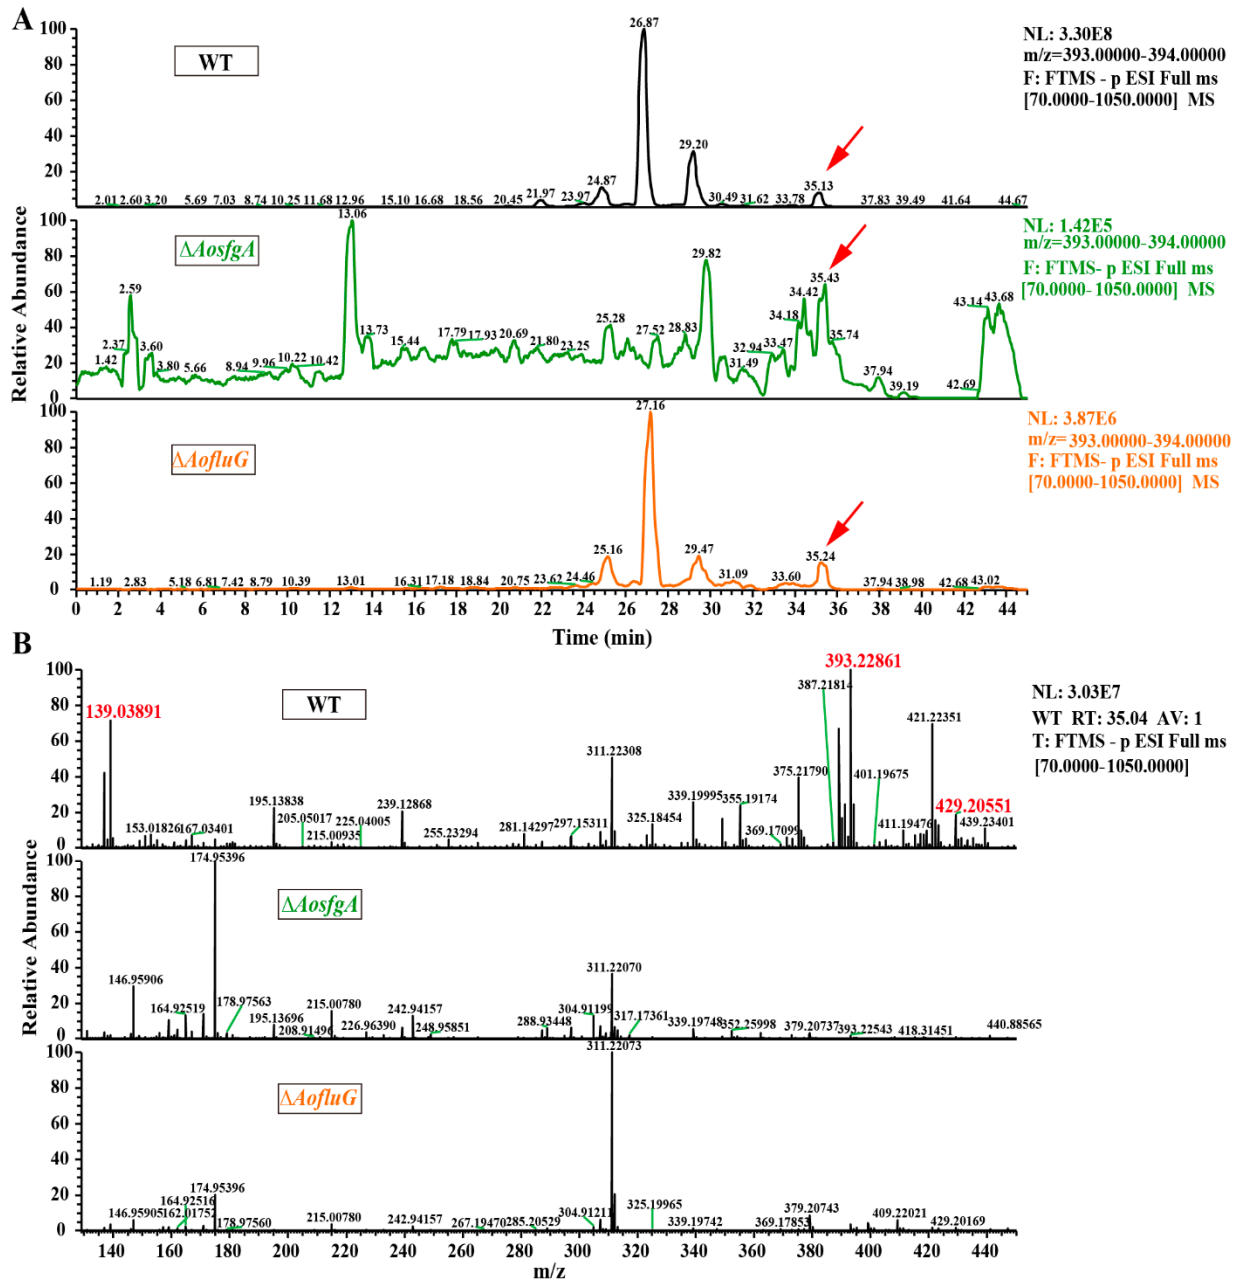

**Figure S4.** Detection of arthrobotrisins of WT,  $\Delta AofluG$  and  $\Delta AofluG$  mutant strains. **(A)** Chromatographic analysis of arthrobotrisins in WT,  $\Delta AofluG$  and  $\Delta AofluG$  mutant strains. **(B)** Mass spectrum analysis of arthrobotrisins in WT,  $\Delta AofluG$  and  $\Delta AofluG$  mutant strains. The diagnostic fragment ions (at m/z 139, 393, and 429) of arthrobotrisins was found in the WT strain.

**Table S1.** List of primers for RT-qPCR in this study.

| Primers                          | Sequence (5'-3')     | Sequence (3'-5')     |
|----------------------------------|----------------------|----------------------|
| <b>Sporulation-related genes</b> |                      |                      |
| AOL_s00043g361 ( <i>AofluG</i> ) | GATTCCAGTCCCGTGAATTC | GCTAAGGAGAGGATGGGCAT |
| AOL_s00097g406 ( <i>AosfgA</i> ) | CTCCAACAATGAGGCCGAGA | GGGCTCGGACAAGGATAAA  |
| AOL_s00215g516 ( <i>AofluA</i> ) | TTCAAACGCAGCTCCTTAC  | AAGCGGTTGACAGATGAGA  |

|                                   |                         |                        |
|-----------------------------------|-------------------------|------------------------|
| AOL_s00078g317 ( <i>AoflbB</i> )  | AGCATATCCAGAACTTGTTCA   | TAGAACCCCAATCAATATCCGG |
| AOL_s00007g157 ( <i>AoflbC</i> )  | CTCTCCGGCAAAGACAATCG    | GTCGACTGAGGATAGTAGCT   |
| AOL_s00097g46 ( <i>AoflbD</i> )   | TAAAAGGCAGAAAGTGACAATGC | CGATGGGATAAGAGTTGGATGA |
| AOL_s00215g48 ( <i>AolphA</i> )   | AATATCCTGCCATACTTACGGG  | CTCTCAATATTTGCACTGCGG  |
| AOL_s00054g700 ( <i>AovosA</i> )  | CAAACCACCCACCACCAAAT    | GGATGGACAGGAGAAGGACC   |
| AOL_s00054g811 ( <i>AovelB</i> )  | ATTCGCAACTTCTCCCTCA     | GGCATGTTTGGATTCTGGGG   |
| AOL_s00169g18 ( <i>AoveA</i> )    | AAGCTACACCAATCAACGC     | TTGCGATGCTGACGATCTTG   |
| AOL_s00075g211 ( <i>AonsdD</i> )  | ATTACGGCCGCCTAGTAGTC    | CTCGTTTGGACCTGGTTGTG   |
| AOL_s00006g570 ( <i>Aohyp1</i> )  | GCGGATCCAACATGAAGCTT    | GGTTGACAACTGGGATGCTG   |
| AOL_s00080g63 ( <i>AoabaA</i> )   | AACTTTATGCGCCTTGTCGT    | TTGGCTAGGTGGTCTGTACG   |
| AOL_s00079g294 ( <i>Aoste12</i> ) | GCTACACCTCGCTATGCCAA    | ATTGTTTCAGTCGCAGCAGC   |
| AOL_s00083g25 ( <i>AostuA</i> )   | AGTCCCGAAACGAGTCTAA     | ATTGATCATGTGATTATCCT   |
| AOL_s00097g514 ( <i>AobrlA</i> )  | TTGAGGCCTCGATCCGTAGA    | AGGTAGATGGCGCTGTTACG   |
| AOL_s00173g221 ( <i>AowetA</i> )  | TTACATGCCACCCAAGTCC     | CAATTGCAACTGCGTCCACA   |
| AOL_s00210g120 ( <i>AomedA</i> )  | TCCGGCCCAATGATTCAGAA    | AGATCGCAGGAACATGGTGA   |
| AOL_s00080g93 ( <i>AolreB</i> )   | CCAGGGTCGTCAGTATCTT     | CAGCATCTTCCAGGTCAA     |
| <b>Internal control</b>           |                         |                        |
| AOL_s00076g640 ( <i>tub</i> )     | CCACCTTCGTCGGTAACTC     | TCGTCCATACCCTCACCAG    |

**Table S2.** List of primers for gene disruption in this study.

| Primers                                        | Sequence (5'-3')                                    |
|------------------------------------------------|-----------------------------------------------------|
| <b>Amplify the <i>AoSfgA</i> gene 5' flank</b> |                                                     |
| <i>AoSfgA</i> -FF                              | GTAACGCCAGGGTTTTCCAGTCACGACGGCGCAAATTTGTCAGTTGGC    |
| <i>AoSfgA</i> -FR                              | ATCCACTTAACGTTACTGAAATCTCCAACGAGCAGGGACGAAAACCTCTCA |
| <b>Amplify the <i>AoSfgA</i> gene 3' flank</b> |                                                     |
| <i>AoSfgA</i> -RF                              | CTCCTTCAATATCATCTTCTGTCTCCGACAATGAACTCGCTGAACTCGC   |
| <i>AoSfgA</i> -RR                              | GCGGATAACAATTTACACAGGAAACAGCGAAAACCCGCCCTCTCGAA     |
| <b>Amplify the <i>AofluG</i> gene 5' flank</b> |                                                     |
| <i>AofluG</i> -FF                              | GTAACGCCAGGGTTTTCCAGTCACGACGGTTAAGCGCTCTCATATTCTCC  |
| <i>AofluG</i> -FR                              | ATCCACTTAACGTTACTGAAATCTCCAACAGATCCCGAACTATTTACCAGG |
| <b>Amplify the <i>AofluG</i> gene 3' flank</b> |                                                     |
| <i>AofluG</i> -FF                              | CTCCTTCAATATCATCTTCTGTCTCCGACCGAACCAGCTATGAGGAACG   |
| <i>AofluG</i> -FR                              | GCGGATAACAATTTACACAGGAAACAGCTACCCGTAAACTGATTCATCG   |
| <b>Amplify the <i>hph</i> cassette</b>         |                                                     |
| Hph-F                                          | GTCGGAGACAGAAGATGATATTGAAGGAGC                      |
| Hph-R                                          | GTTGGAGATTTCAGTAACGTTAAGTGGAT                       |
| <b>Verify the transformants</b>                |                                                     |
| <i>AoSfgA</i> -YZ-F                            | TGAGAGTTTTCGTCCCTGCTC                               |
| <i>AoSfgA</i> -YZ-R                            | GCGAGTTCAGCGAGTTCATT                                |
| <i>AofluG</i> -YZ-F                            | GTTAAGCGCTCTCATATTCTCC                              |
| <i>AofluG</i> -YZ-R                            | TACCCGTAAACTGATTCATCG                               |
| <b>Make Southern blotting probe</b>            |                                                     |
| <i>AoSfgA</i> -TZ-F                            | CCCCCAAAGAGCAACCGTAA                                |
| <i>AoSfgA</i> -TZ-R                            | GAGCAGGGACGAAAACCTCTCA                              |
| <i>AofluG</i> -TZ-F                            | CTGCACCCGTTTCGATTTTCG                               |

**Table S3.** The top twenty compounds with significant changes in  $\Delta AofsgA$  mutant strain.

| Name                                                                                                                  | Formula                                                            | Molecular Weight | RT (min) | Log2 Fold Change: $\Delta AofsgA/WT$ | P-value: $\Delta AofsgA/WT$ |
|-----------------------------------------------------------------------------------------------------------------------|--------------------------------------------------------------------|------------------|----------|--------------------------------------|-----------------------------|
| Prednisone                                                                                                            | C <sub>21</sub> H <sub>26</sub> O <sub>5</sub>                     | 358.17724        | 35.799   | -9.74                                | 0.049952                    |
| Diamino-N-carbamoylmethaniminium                                                                                      | C <sub>2</sub> H <sub>7</sub> N <sub>4</sub> O                     | 103.06122        | 2.375    | 4.56                                 | 0.04994505                  |
| 2'-(Ethylsulfanyl)-7',7'-dimethyl-5'-oxo-5',6',7',8'-tetrahydro-1'H-spiro[cyclohexane-1,4'-quinoline]-3'-carbonitrile | C <sub>19</sub> H <sub>26</sub> N <sub>2</sub> O S                 | 330.17787        | 34.543   | 2.11                                 | 0.04976551                  |
| 2-hydroxy palmitic acid                                                                                               | C <sub>16</sub> H <sub>32</sub> O <sub>3</sub>                     | 272.23472        | 41.169   | -4.07                                | 0.04974411                  |
| [FA (18:4)]6Z_9Z_12Z_15Z-octadecatetraenoic acid                                                                      | C <sub>18</sub> H <sub>28</sub> O <sub>2</sub>                     | 276.20826        | 37.006   | -5.26                                | 0.04956678                  |
| 9-Keto heptadecylic acid                                                                                              | C <sub>17</sub> H <sub>32</sub> O <sub>3</sub>                     | 284.23454        | 41.105   | -7.22                                | 0.04954504                  |
| 3,4-Methylenedioxy-2',4'-dimethoxychalcone                                                                            | C <sub>18</sub> H <sub>16</sub> O <sub>5</sub>                     | 312.09903        | 34.003   | -6.16                                | 0.04954233                  |
| UNII:212]QJ15PS                                                                                                       | C <sub>8</sub> H <sub>12</sub>                                     | 108.09399        | 37.469   | -3.21                                | 0.04953087                  |
| N-arachidonylethanolamine                                                                                             | C <sub>22</sub> H <sub>3</sub> N O <sub>2</sub>                    | 347.28166        | 41.441   | -4.72                                | 0.04944926                  |
| Cyclo(glycylprolylglycylprolylglycylprolyl)                                                                           | C <sub>21</sub> H <sub>30</sub> N <sub>6</sub> O <sub>6</sub>      | 462.22426        | 33.176   | -3.41                                | 0.04940738                  |
| Malyngic acid                                                                                                         | C <sub>18</sub> H <sub>32</sub> O <sub>5</sub>                     | 328.22431        | 33.425   | -3.84                                | 0.04925605                  |
| 3-[(4-Chlorophenyl) sulfanyl]-6-methoxy-N-[3-(4-methyl-1-piperazinyl) propyl]-1H-indole-2-carboxamide                 | C <sub>24</sub> H <sub>29</sub> Cl N <sub>4</sub> O <sub>2</sub> S | 472.16765        | 29.547   | -5.69                                | 0.04919087                  |
| Euchrenone a14                                                                                                        | C <sub>30</sub> H <sub>32</sub> O <sub>5</sub>                     | 472.22394        | 42.87    | -3.67                                | 0.04917107                  |
| 2,6-DIMETHYLNAPHTHALENE                                                                                               | C <sub>12</sub> H <sub>12</sub>                                    | 156.09361        | 36.165   | -4.59                                | 0.0491285                   |
| Î±-Calacorene                                                                                                         | C <sub>15</sub> H <sub>20</sub>                                    | 200.1561         | 31.246   | -6.42                                | 0.04907292                  |
| Panaxynol                                                                                                             | C <sub>17</sub> H <sub>24</sub> O                                  | 244.18227        | 38.672   | -7.64                                | 0.04892482                  |
| 4S-hydroperoxy-17S-HDHA                                                                                               | C <sub>22</sub> H <sub>32</sub> O <sub>5</sub>                     | 376.2241         | 40.336   | -9.83                                | 0.04888879                  |
| 6,3',4'-Trihydroxy-4-methoxy-5-methylaurone                                                                           | C <sub>17</sub> H <sub>14</sub> O <sub>6</sub>                     | 314.07835        | 33.917   | -7.12                                | 0.0488716                   |
| 3,6,9,12,15-octadecapentaenoic acid                                                                                   | C <sub>18</sub> H <sub>26</sub> O <sub>2</sub>                     | 274.19271        | 40.415   | -5.74                                | 0.04885755                  |
| Auricolic acid                                                                                                        | C <sub>20</sub> H <sub>36</sub> O <sub>3</sub>                     | 324.26583        | 40.792   | -2.37                                | 0.04885534                  |

**Table S4.** The top twenty compounds with significant changes in  $\Delta AofluG$  mutant strain.

| Name                                              | Formula                                        | Molecular Weight | RT (min) | Log2 Fold Change: $\Delta AofluG/WT$ | P-value: $\Delta AofluG/WT$ |
|---------------------------------------------------|------------------------------------------------|------------------|----------|--------------------------------------|-----------------------------|
| Trans-Non-2-en-(4,6,8)-trien-1-ol                 | C <sub>9</sub> H <sub>6</sub> O                | 130.04186        | 10.164   | -3.84                                | 0.04999131                  |
| 3'-Angeloyloxy-2',4'-dihydroxy-6'-methoxychalcone | C <sub>21</sub> H <sub>20</sub> O <sub>6</sub> | 368.12516        | 32.788   | -4.81                                | 0.04981307                  |
| Trichursin F                                      | C <sub>25</sub> H <sub>36</sub> O <sub>7</sub> | 448.24465        | 36.963   | -6.84                                | 0.04979714                  |

|                                                                      |                                                             |           |        |       |            |
|----------------------------------------------------------------------|-------------------------------------------------------------|-----------|--------|-------|------------|
| 12,13-dihydroxy-11-methoxy-9-octadecenoic acid                       | C <sub>19</sub> H <sub>36</sub> O <sub>5</sub>              | 344.25549 | 35.012 | -8.84 | 0.0497816  |
| DQ6125000                                                            | C <sub>14</sub> H <sub>14</sub> O                           | 198.10416 | 31.429 | -2.09 | 0.04975198 |
| 1H-Imidazole-4,5-dicarbohydrazide                                    | C <sub>5</sub> H <sub>8</sub> N <sub>6</sub> O <sub>2</sub> | 184.07044 | 8.797  | -4.16 | 0.04972341 |
| CZ1330000                                                            | C <sub>12</sub> H <sub>16</sub>                             | 160.12498 | 10.392 | -2.2  | 0.04963597 |
| Callyspongenol C                                                     | C <sub>22</sub> H <sub>24</sub> O                           | 304.18187 | 33.137 | -5.72 | 0.04961497 |
| Berkazaphilone A                                                     | C <sub>13</sub> H <sub>16</sub> O <sub>3</sub>              | 220.10954 | 40.575 | -5.56 | 0.04958738 |
| Grandiflorone                                                        | C <sub>19</sub> H <sub>22</sub> O <sub>4</sub>              | 314.15126 | 33.426 | -2.64 | 0.04954353 |
| 12S-hydroxy-16-heptadecynoic acid                                    | C <sub>17</sub> H <sub>30</sub> O <sub>3</sub>              | 282.21888 | 39.862 | -8.47 | 0.04953914 |
| naphthalen-1-ethanol                                                 | C <sub>12</sub> H <sub>12</sub> O                           | 172.08855 | 17.434 | -2.38 | 0.04952013 |
| 7,8,9,10-tetrahydro-9-hydroxy-4-methoxy-9-propyltetracene-6,11-dione | C <sub>22</sub> H <sub>22</sub> O <sub>4</sub>              | 350.15101 | 32.857 | -5.93 | 0.04949931 |
| Deoxycorticosterone Acetate                                          | C <sub>23</sub> H <sub>32</sub> O <sub>4</sub>              | 372.2289  | 40.875 | -8.03 | 0.04949851 |
| 2,2-Diphenylcyclopentanone                                           | C <sub>17</sub> H <sub>16</sub> O                           | 236.11963 | 18.766 | -4.41 | 0.04936962 |
| Brosimacutin G                                                       | C <sub>20</sub> H <sub>20</sub> O <sub>6</sub>              | 356.12553 | 24.165 | -2.83 | 0.04920574 |
| Dihydrochalcone                                                      | C <sub>15</sub> H <sub>14</sub> O                           | 210.10388 | 31.847 | -2.31 | 0.04917659 |
| 4'-O-Methylbavachalcone                                              | C <sub>22</sub> H <sub>24</sub> O <sub>4</sub>              | 352.1668  | 24.108 | -2.41 | 0.04911524 |
| Benzoin                                                              | C <sub>14</sub> H <sub>12</sub> O <sub>2</sub>              | 212.08326 | 15.401 | -2.55 | 0.04907194 |
| 3,5-anhydrogalacturonopyranosylbacteriohopanetetrol                  | C <sub>41</sub> H <sub>68</sub> O <sub>9</sub>              | 704.48475 | 38.647 | -4.82 | 0.04906659 |
